# Supplementary material for: Homochiral association of binuclear trans-bis(β-iminoaryloxy)palladium(ii) complexes doubly linked with m-xylylene spacers: drastic linker-dependence of the association chirality of chiral clothespin-shaped molecules
Source: Royal Society of Chemistry journal article supplement (doi:10.1039/c6qo00315j), 2016-01-01
Supplement: c6qo00315j1.pdf [file c6qo00315j1.pdf]

Electronic Supplementary Information (ESI) for

**Homochiral Association of Binuclear *trans*-Bis( $\beta$ -iminoaryloxy)palladium(II) Complexes Doubly Linked with *m*-Xylylene Spacers: Drastic Linker-Dependence of the Association Chirality of Chiral Clothespin-Shaped Molecules**

Masaya Naito,<sup>a</sup> Naruyoshi Komiya<sup>b</sup> and Takeshi Naota<sup>\*a</sup>

<sup>a</sup>Department of Chemistry, Graduate School of Engineering Science, Osaka University, Machikaneyama, Toyonaka, Osaka 560-8531, Japan

<sup>b</sup>Chemistry Laboratory, The Jikei University School of Medicine, Kokuryo, Chofu, Tokyo 182-8570, Japan

**Table of Contents**

|                |                                                                                                                                                |    |
|----------------|------------------------------------------------------------------------------------------------------------------------------------------------|----|
| <b>Fig. S1</b> | NOESY spectrum of <b>2</b> (500 MHz, CDCl <sub>3</sub> , 298 K, mixing time = 0.700 s).                                                        | S2 |
| <b>Fig. S2</b> | <sup>1</sup> H NMR spectra of <b>2</b> and <b>4</b> (500 MHz, CDCl <sub>3</sub> , 298 K).                                                      | S3 |
| <b>Fig. S3</b> | ORTEP representations of ( <i>R</i> )- <b>3</b> and ( <i>R</i> )- <b>4</b> as their racemic crystals.                                          | S4 |
| <b>Fig. S4</b> | <sup>1</sup> H NMR spectra of (±)- <b>1</b> and (±)- <b>2</b> at 188–223 K (400 MHz, toluene- <i>d</i> <sub>8</sub> , 1.0×10 <sup>-3</sup> M). | S5 |

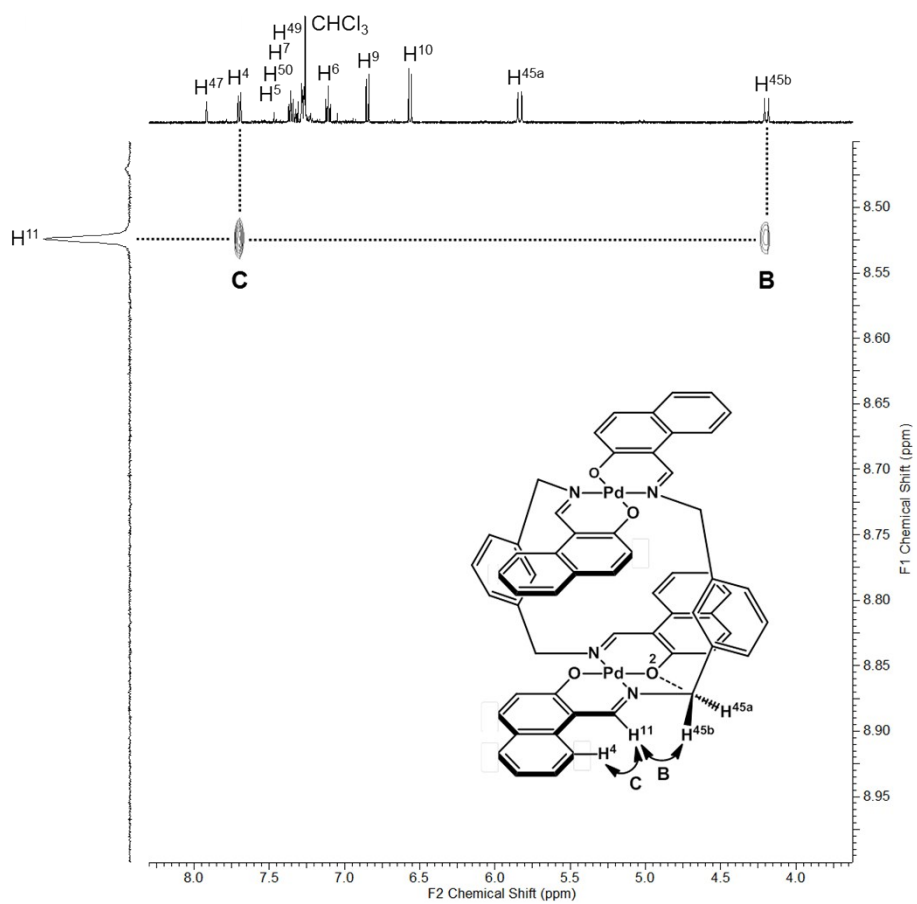

**Fig. S1** NOESY spectrum (500 MHz) of **2** in  $\text{CDCl}_3$  (298 K, mixing time = 0.700 s).

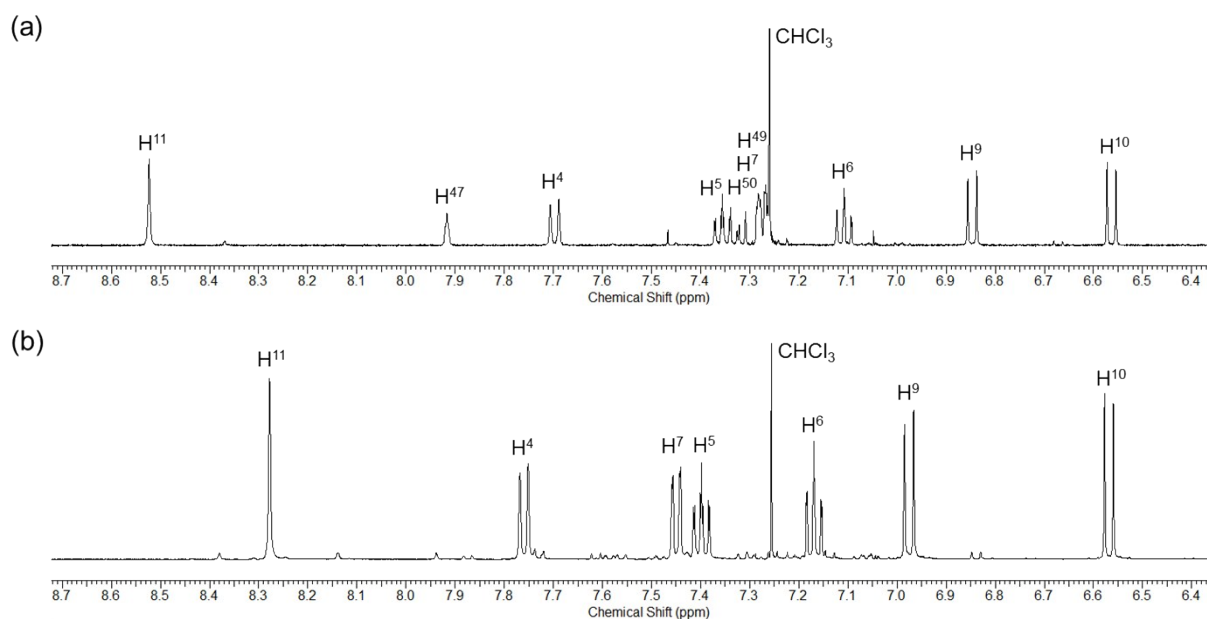

**Fig. S2**  $^1\text{H}$  NMR spectra (500 MHz) of the aromatic region of (a) *m*-xylylene-linked complex **2** and (b) pentamethylene-linked analogue **4** in  $\text{CDCl}_3$  at 298 K. The spectrum of **4** is presented only for comparison.<sup>11</sup>

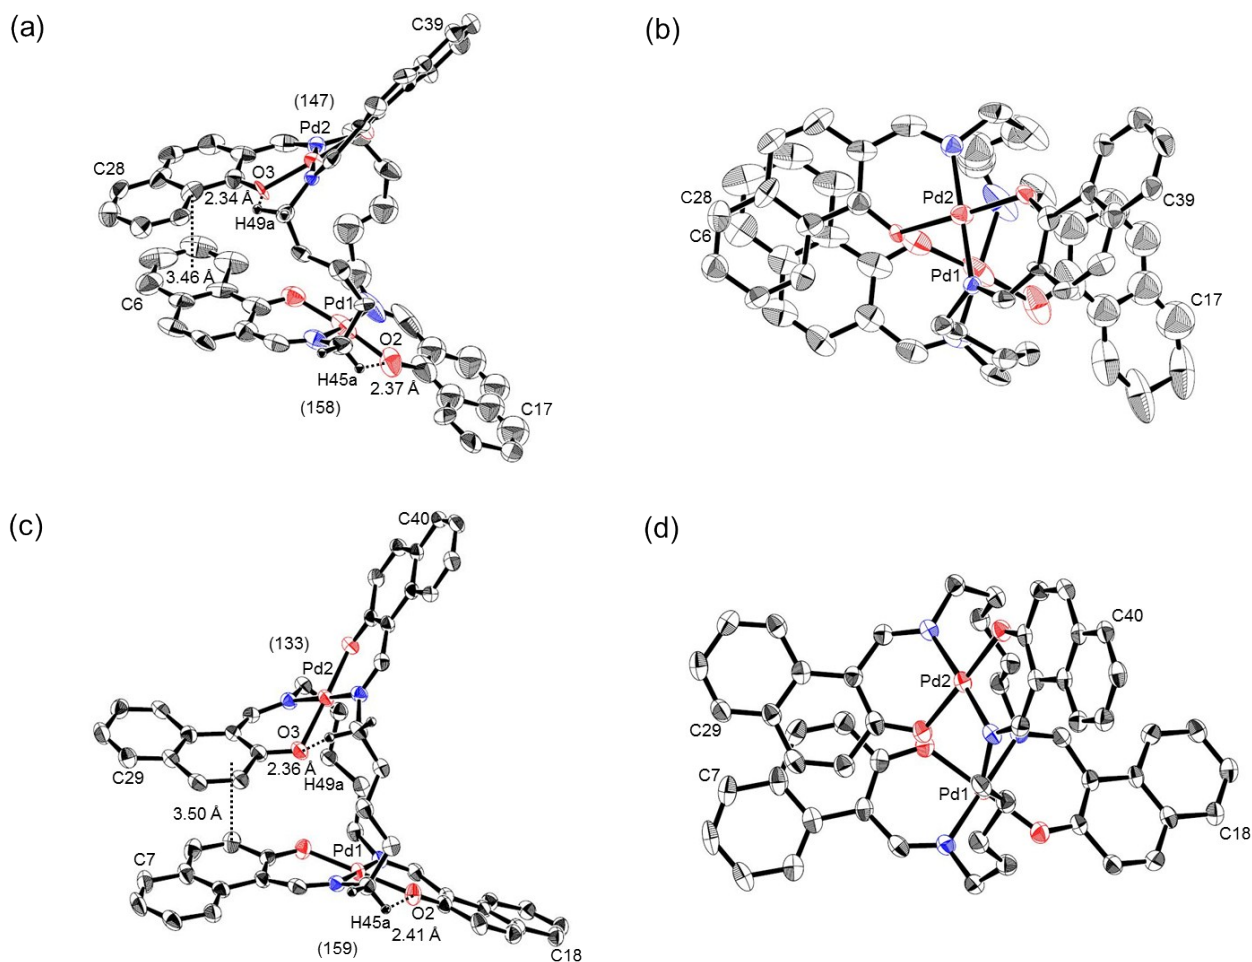

**Fig. S3** ORTEP representations of (a,b) (*R*)-**3** and (c,d) (*R*)-**4** as their racemic crystals, showing (a,c) side and (b,d) overhead views. The angles of (a) C(6)–Pd(1)–C(17)/C(28)–Pd(2)–C(39) and (c) C(7)–Pd(1)–C(18)/C(29)–Pd(2)–C(40) are provided in parentheses. Stacking and hydrogen-bonding distances are indicated for each structure. Thermal ellipsoids are shown at the 50% probability level. The structures of **3** and **4** are presented only for comparison with those of *m*-xylylene-linked analogues **1** and **2** shown in Fig. 2.<sup>11</sup>

(a)

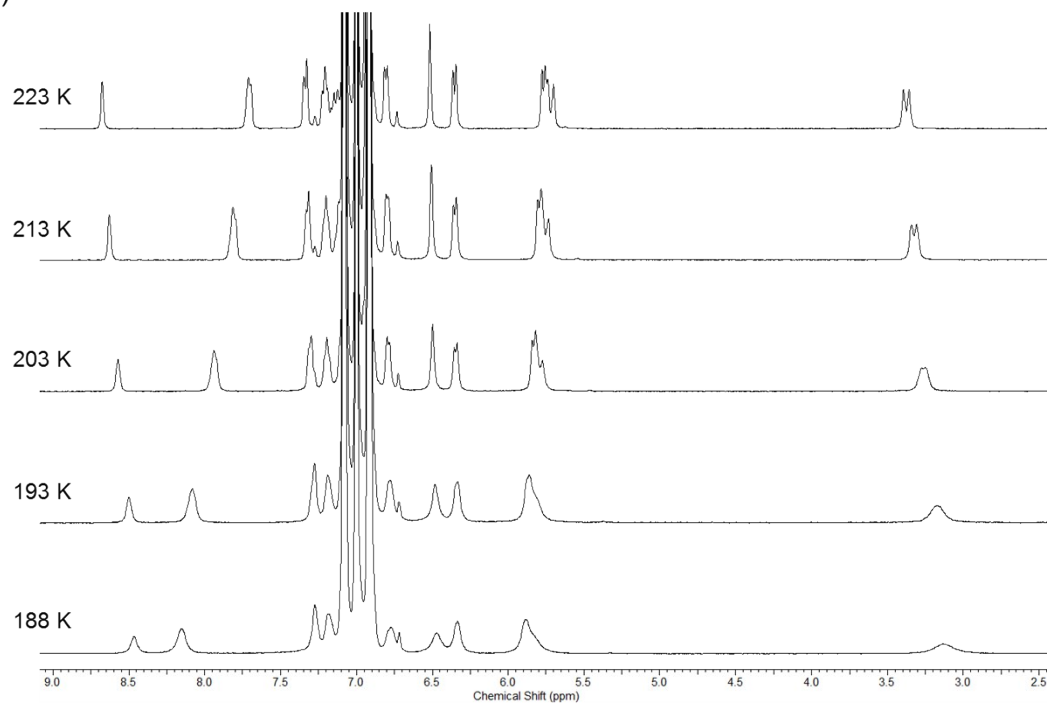

(b)

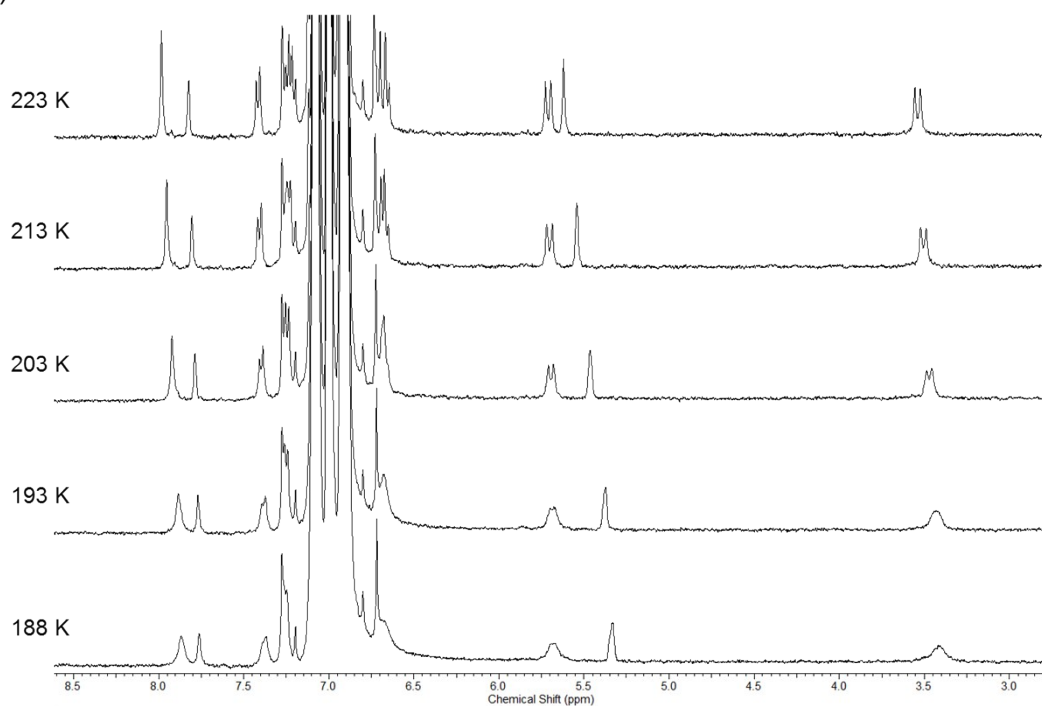

**Fig. S4** Variable-temperature <sup>1</sup>H NMR spectra (400 MHz) of (a) (±)-**1** and (b) (±)-**2** in toluene-*d*<sub>8</sub> ( $1.0 \times 10^{-3}$  M) at 188–223 K.
